# Supplementary material
Source: publisher figshare collection journal article supplement (https://gsajournals.figshare.com/ndownloader/files/22722788)
Supplement: Supplementary file 1 [file 22722788]

## Sheet: Table S3
Table S3. Estimates of divergence time of Jean-Talon with related beer strains using S. cerevisiae reference (S288C) as an outgroup.
Strain (Jean-Talon's relative)	Divergence time with outgroup in generations	Mutation rate (per bp per generation)	Total synonymous sites from pairwise alignments with Jean-Talon	ABA**	BAA**	Proportion of ABA*	Proportion of BAA**	Mean proportion of ABA* & BAA**	Divergence with Jean-Talon in generations (ABA*)	Divergence with Jean-Talon in generations (BAA**)	Mean divergence with Jean-Talon in generations (ABA* & BAA**)	Divergence with Jean-Talon in years (ABA*; 150^)	Divergence with Jean-Talon in years (BAA**; 150^)	Mean divergence with Jean-Talon in years (150^)	Divergence with Jean-Talon in years (ABA*; 2920^^)	Divergence with Jean-Talon in years (BAA**; 2920^^)	Mean divergence with Jean-Talon in years (2920^^)
A.Muntons	1.40445e+07	1.67e-10	1.39396e+06	1555	2933	0.00111552	0.00210407	0.0016098	15666.9	29550.6	22608.8	104.446	197.004	150.725	5.36539	10.1201	7.74272
A.S-33	1.40445e+07	1.67e-10	921368	726	1753	0.000787959	0.00190261	0.00134528	11066.5	26721.1	18893.8	73.7764	178.141	125.959	3.78989	9.15106	6.47047
BE005	1.40445e+07	1.67e-10	1.60053e+06	4173	5489	0.00260726	0.00342948	0.00301837	36617.6	48165.3	42391.4	244.117	321.102	282.609	12.5403	16.495	14.5176
CFI	1.40445e+07	1.67e-10	1.60136e+06	4287	5571	0.00267711	0.00347893	0.00307802	37598.5	48859.7	43229.1	250.657	325.731	288.194	12.8762	16.7328	14.8045
CFN	1.40445e+07	1.67e-10	1.60137e+06	4316	5703	0.0026952	0.00356134	0.00312827	37852.7	50017.1	43934.9	252.351	333.447	292.899	12.9632	17.1291	15.0462
Mean	1.40445e+07	1.67e-10	1.42372e+06	3011.4	4289.8	0.00197661	0.00289528	0.00243595	27760.4	40662.7	34211.6	185.07	271.085	228.077	9.507	13.9256	11.7163
* ABA patterns (shared alleles between Jean-Talon and outgroup) in triplets: Jean-Talon, relative, outgroup; inform about the length of a branch of a relative from its common ancestor with Jean-Talon
** BAA patterns (shared alleles between relative and outgroup) in triplets: Jean-Talon, relative, outgroup; inform about the length of a branch of Jean-Talon from its common ancestor with a relative
^ divergence estimates based on yeast generation time of 150 per year
^^ divergence estimates based on yeast generation time of 2920 per year
